# Supplementary material for: Enhanced ectopic bone formation by strontium-substituted calcium phosphate ceramics through regulation of osteoclastogenesis and osteoblastogenesis
Source: Royal Society of Chemistry journal article supplement (doi:10.1039/d2bm00348a), 2022-01-01

**Supplementary Table 1.** Primer sequences used for real-time quantitative PCR (q-PCR) analysis

| <i>Gene</i>     | <i>5' to 3'</i> | <i>Primers</i>           |
|-----------------|-----------------|--------------------------|
| <i>Nfatc1</i>   | Sense           | CCGTTGCTTCCAGAAAATAACA   |
|                 | Anti-Sense      | TGTGGGATGTGAACTCGGAA     |
| <i>Atp6v0d2</i> | Sense           | AAGCCTTTGTTTGACGCTGT     |
|                 | Anti-Sense      | TTCGATGCCTCTGTGAGATG     |
| <i>Ctsk</i>     | Sense           | CTTCCAATACGTGCAGCAGA     |
|                 | Anti-Sense      | TCTTCAGGGCTTTCTCGTTC     |
| <i>EphrinB2</i> | Sense           | GACTGACTGGTGAGTGGTGG     |
|                 | Anti-Sense      | TCTGTGCTCTAGCTGGTCCT     |
| <i>Rank</i>     | Sense           | TGCAGCTCTCCATGACACTG     |
|                 | Anti-Sense      | CAGCCACTACTACCACAGAGATG  |
| <i>Rankl</i>    | Sense           | CATCGGGTCCATAAAG         |
|                 | Anti-Sense      | GAAGCAAATGTTGGCGTA       |
| <i>Opg</i>      | Sense           | ATGCCGAGAGGTAGAGAGGATA   |
|                 | Anti-Sense      | GTCTCTGTTTTGATGTTTCCACAG |
| <i>Alp</i>      | Sense           | ATCTTTGGTCTGGCTCCCATG    |
|                 | Anti-Sense      | TTTCCCGTTCACCGTCCAC      |
| <i>Bsp</i>      | Sense           | GTTTCAGCAGACAACCCACC     |
|                 | Anti-Sense      | CTCCCCGTTCTCGTTGTCATA    |
| <i>Opn</i>      | Sense           | CCCTCGATGTCATCCCTGTT     |
|                 | Anti-Sense      | CCCTTCCGTTGTTGTCCTG      |
| $\beta$ -Actin  | Sense           | GTGCTATGTTGCTCTAGACTTCG  |
|                 | Anti-Sense      | ATGCCACAGGATTCCATACC     |
| <i>Gapdh</i>    | Sense           | TGGTGAAGGTCGGTGTGAAC     |
|                 | Anti-Sense      | CCATGTAGTTGAGGTCAATGAAGG |

**Supplementary Figure 1 (Fig. S1).** SEM images visualize the morphology of osteoclast precursors (RAW 264.7 cells) on (a,d) Sr-BCP and (c, d) BCP after 6-day culture under 100 ng/mL RANKL stimulation. Scale bar: 100  $\mu$ m. Yellow arrows: large-sized osteoclast-like cells; transparent arrow: unfused macrophages.

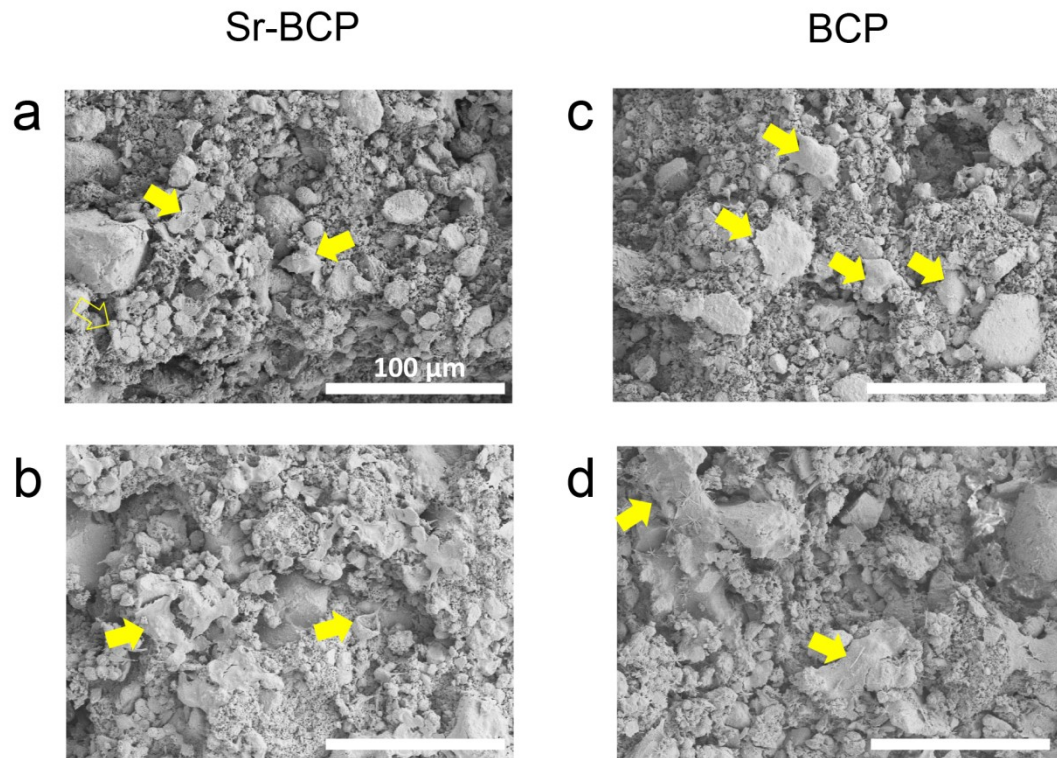

Supplement: d2bm00348a1.pdf [file d2bm00348a1.pdf]
