# Supplementary figures and images for: Enhanced ectopic bone formation by strontium-substituted calcium phosphate ceramics through regulation of osteoclastogenesis and osteoblastogenesis
Source: Royal Society of Chemistry journal article supplement (doi:10.1039/d2bm00348a), 2022-01-01

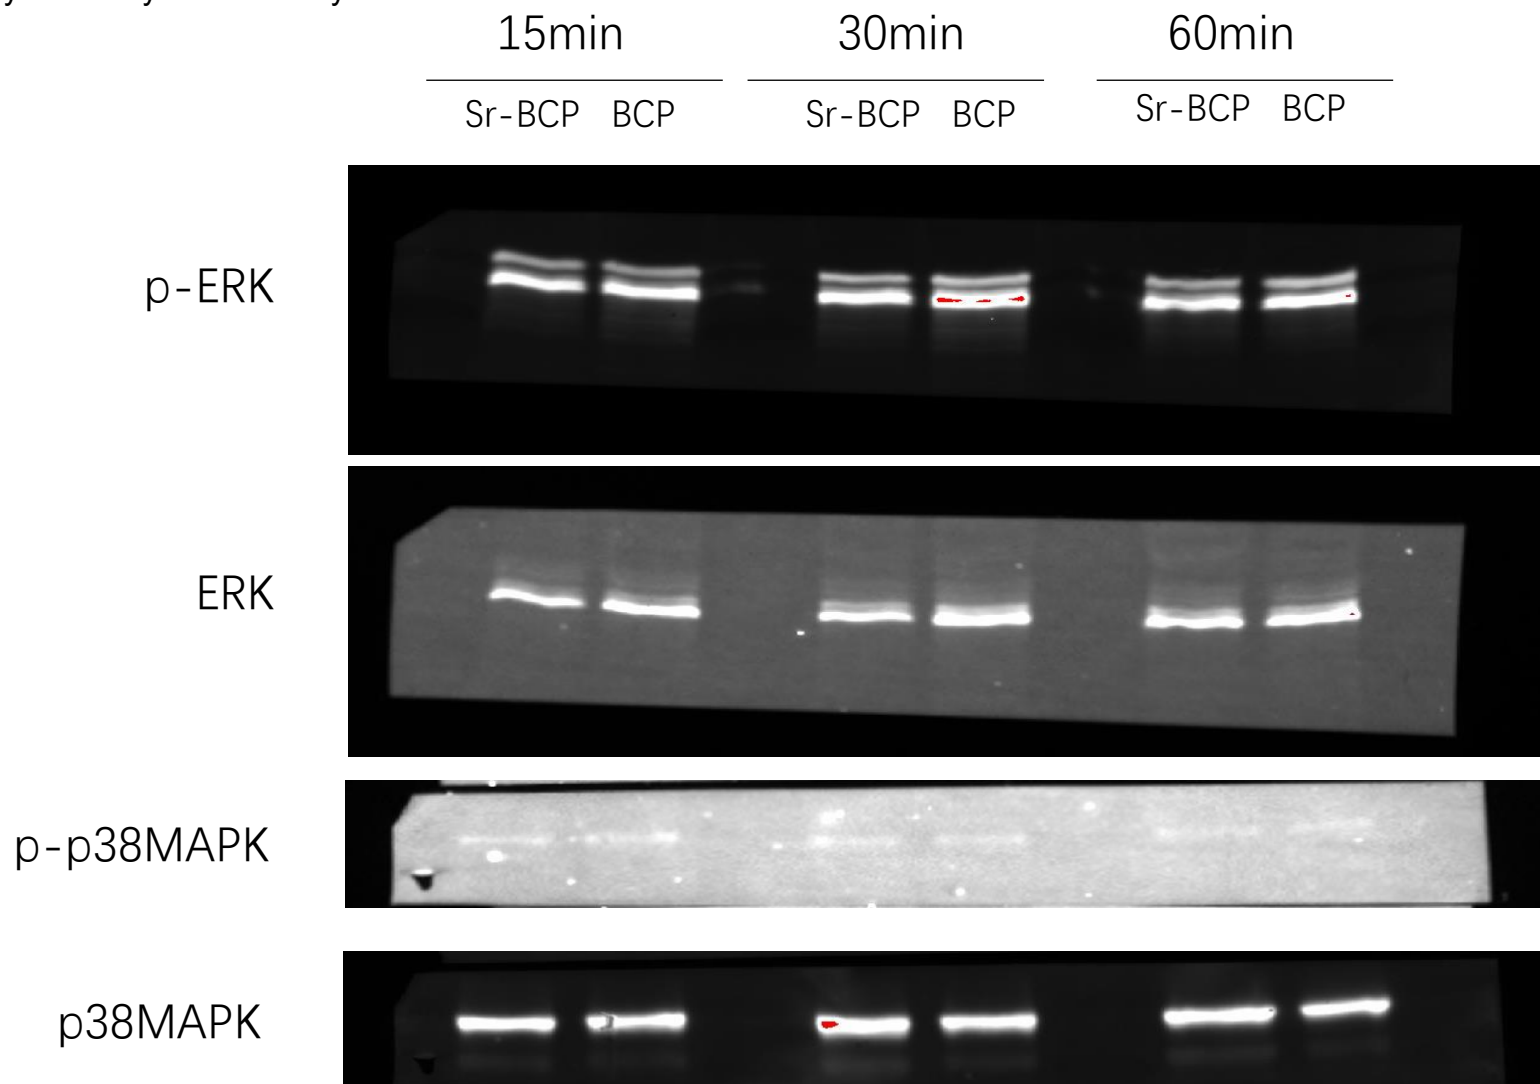

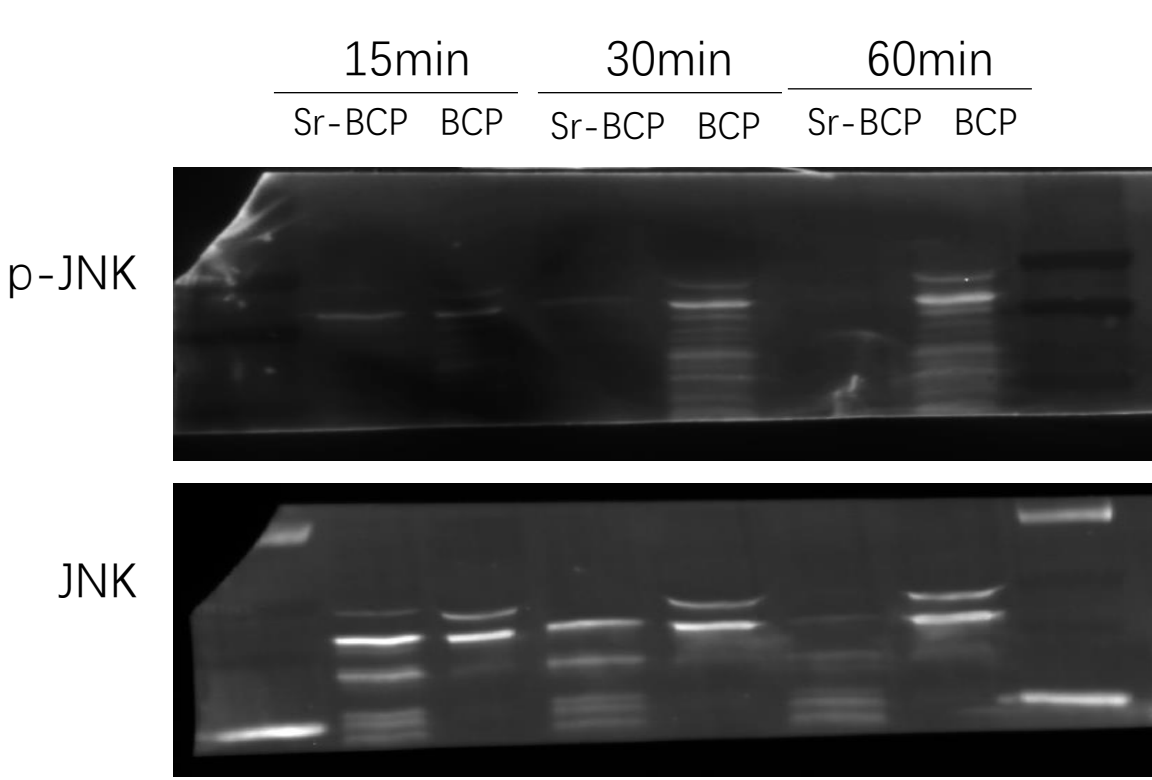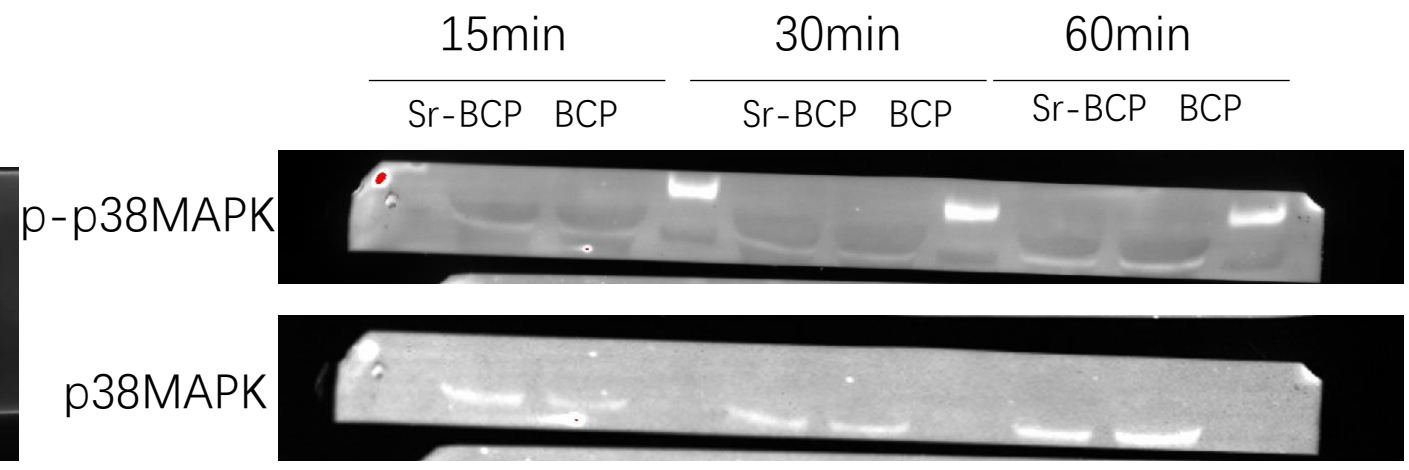

Supplement: d2bm00348a2.pdf [file d2bm00348a2.pdf]
